# Supplementary material for: Therapeutic innovation in oncology: What do you mean? What we cannot talk about, we must keep silent. L. Wittgenstein
Source: Research Square preprint supplement (doi:10.21203/rs.3.rs-6350857/v1), 2025-05-06
Supplement: Supplementary file 1 [file 159fb55050048ba0d06c13a1.pdf]

# Répondant

Veuillez remplir le questionnaire ci-dessous.

Merci !

|                                                                        |                                                                                                                                                                                                                                                                                                                                                                                                                        |
|------------------------------------------------------------------------|------------------------------------------------------------------------------------------------------------------------------------------------------------------------------------------------------------------------------------------------------------------------------------------------------------------------------------------------------------------------------------------------------------------------|
| Age (years)                                                            | <div></div>                                                                                                                                                                                                                                                                                                                                                                                                            |
| Sex                                                                    | <div><div><input type="radio"/> male</div><div><input type="radio"/> female</div></div>                                                                                                                                                                                                                                                                                                                                |
| Job                                                                    | <div><div><input type="radio"/> doctor</div><div><input type="radio"/> pharmacist</div><div><input type="radio"/> biologist</div><div><input type="radio"/> project manager or equivalent</div><div><input type="radio"/> engineer</div><div><input type="radio"/> statistician</div><div><input type="radio"/> other</div></div>                                                                                      |
| Detail                                                                 | <div></div>                                                                                                                                                                                                                                                                                                                                                                                                            |
| Are you a member of a patient association?                             | <div><div><input type="radio"/> Oui</div><div><input type="radio"/> Non</div></div>                                                                                                                                                                                                                                                                                                                                    |
| Main function                                                          | <div></div>                                                                                                                                                                                                                                                                                                                                                                                                            |
| Principal place of practice (optional)                                 | <div><div><input type="radio"/> Hospital/university</div><div><input type="radio"/> Inserm</div><div><input type="radio"/> Health authorities and agencies</div><div><input type="radio"/> Cooperative group</div><div><input type="radio"/> CPP</div><div><input type="radio"/> Pharmaceutical industry</div><div><input type="radio"/> CRO</div><div><input type="radio"/> Other</div></div>                         |
| If you have more than one practice location, please specify (optional) | <div><div><input type="checkbox"/> Hospital/university</div><div><input type="checkbox"/> Inserm</div><div><input type="checkbox"/> Health authorities and agencies</div><div><input type="checkbox"/> Cooperative group</div><div><input type="checkbox"/> CPP</div><div><input type="checkbox"/> Pharmaceutical industry</div><div><input type="checkbox"/> CRO</div><div><input type="checkbox"/> Other</div></div> |
| Are you personally involved in clinical research?                      | <div><div><input type="radio"/> Oui</div><div><input type="radio"/> Non</div></div>                                                                                                                                                                                                                                                                                                                                    |
| Are you or have you ever been an investigator in a therapeutic trial?  | <div><div><input type="radio"/> Oui</div><div><input type="radio"/> Non</div></div>                                                                                                                                                                                                                                                                                                                                    |
| Do you have any links of interest with the pharmaceutical industry?    | <div><div><input type="radio"/> Oui</div><div><input type="radio"/> Non</div></div>                                                                                                                                                                                                                                                                                                                                    |

**We would like to know your opinion on innovations in the field of therapeutics. Thank you for answering these questions**

Could you give 1 to 3 synonyms for therapeutic innovation?

\_\_\_\_\_

Could you briefly give 1 or 3 examples in the last 10 years?

\_\_\_\_\_

Using the example(s) you have chosen, what elements would you suggest are the basis for innovation(s)?

\_\_\_\_\_

What do you think is the most important factor in spotting an innovation?

- ☐ Mechanism of action  
☐ Therapeutic target  
☐ In vitro results  
☐ Animal results  
☐ Method of administration  
☐ Underlying technology

What do you think is the most important factor in confirming an innovation?

- ☐ Mechanism of action  
☐ Therapeutic target  
☐ Method of administration  
☐ Underlying technology  
☐ Clinical outcome  
☐ Investment

**Please tell us whether you agree with these statements about therapeutic innovations. (0: strongly disagree - 10: strongly agree)**

They necessarily propose a new mechanism of action

strongly disagree

strongly agree

=====

(Place a mark on the scale above)

They are based on fundamental research

strongly disagree

strongly agree

=====

(Place a mark on the scale above)

They use new models and currents of thought

strongly disagree

strongly agree

=====

(Place a mark on the scale above)

They use conceptual discoveries

strongly disagree

strongly agree

=====

(Place a mark on the scale above)

They require creativity

strongly disagree

strongly agree

=====

(Place a mark on the scale above)

They will benefit from AI and Big Data

strongly disagree

strongly agree

=====

(Place a mark on the scale above)

They define a new therapeutic family

strongly disagree

strongly agree

=====

(Place a mark on the scale above)

|                                    |                                                                                                                                                                                                                  |
|------------------------------------|------------------------------------------------------------------------------------------------------------------------------------------------------------------------------------------------------------------|
| especially oncology                | <div style="display: flex; justify-content: space-between;"> <span>strongly disagree</span> <span>strongly agree</span> </div> <div style="text-align: center;"> <p>(Place a mark on the scale above)</p> </div> |
| especially serious diseases        | <div style="display: flex; justify-content: space-between;"> <span>strongly disagree</span> <span>strongly agree</span> </div> <div style="text-align: center;"> <p>(Place a mark on the scale above)</p> </div> |
| especially rare diseases           | <div style="display: flex; justify-content: space-between;"> <span>strongly disagree</span> <span>strongly agree</span> </div> <div style="text-align: center;"> <p>(Place a mark on the scale above)</p> </div> |
| especially paediatrics             | <div style="display: flex; justify-content: space-between;"> <span>strongly disagree</span> <span>strongly agree</span> </div> <div style="text-align: center;"> <p>(Place a mark on the scale above)</p> </div> |
| especially the elderly             | <div style="display: flex; justify-content: space-between;"> <span>strongly disagree</span> <span>strongly agree</span> </div> <div style="text-align: center;"> <p>(Place a mark on the scale above)</p> </div> |
| especially orphan diseases         | <div style="display: flex; justify-content: space-between;"> <span>strongly disagree</span> <span>strongly agree</span> </div> <div style="text-align: center;"> <p>(Place a mark on the scale above)</p> </div> |
| All medical conditions can benefit | <div style="display: flex; justify-content: space-between;"> <span>strongly disagree</span> <span>strongly agree</span> </div> <div style="text-align: center;"> <p>(Place a mark on the scale above)</p> </div> |
| All diseases can benefit           | <div style="display: flex; justify-content: space-between;"> <span>strongly disagree</span> <span>strongly agree</span> </div> <div style="text-align: center;"> <p>(Place a mark on the scale above)</p> </div> |

Please tell us whether you agree with these statements about their development (0: strongly disagree - 10: strongly agree).

|                                                 |                                                                     |                |
|-------------------------------------------------|---------------------------------------------------------------------|----------------|
| It is risky                                     | strongly disagree                                                   | strongly agree |
|                                                 | <div><div></div></div> <div>(Place a mark on the scale above)</div> |                |
| It is costly                                    | strongly disagree                                                   | strongly agree |
|                                                 | <div><div></div></div> <div>(Place a mark on the scale above)</div> |                |
| It is too costly                                | strongly disagree                                                   | strongly agree |
|                                                 | <div><div></div></div> <div>(Place a mark on the scale above)</div> |                |
| It takes a long time                            | strongly disagree                                                   | strongly agree |
|                                                 | <div><div></div></div> <div>(Place a mark on the scale above)</div> |                |
| It relies on pharmaceutical companies           | strongly disagree                                                   | strongly agree |
|                                                 | <div><div></div></div> <div>(Place a mark on the scale above)</div> |                |
| It uses institutional research                  | strongly disagree                                                   | strongly agree |
|                                                 | <div><div></div></div> <div>(Place a mark on the scale above)</div> |                |
| It is booming                                   | strongly disagree                                                   | strongly agree |
|                                                 | <div><div></div></div> <div>(Place a mark on the scale above)</div> |                |
| What are your main suggestions for improvement? | <div></div>                                                         |                |

Before moving on to a clinical evaluation of a therapeutic innovation, can you rank the importance of the data that should be available? Rank from 1 (most important) to 4 (least important).

|                                 |                       |                       |                       |                       |
|---------------------------------|-----------------------|-----------------------|-----------------------|-----------------------|
|                                 | 1                     | 2                     | 3                     | 4                     |
| data on the mechanism of action | <input type="radio"/> | <input type="radio"/> | <input type="radio"/> | <input type="radio"/> |
| PK-PD data                      | <input type="radio"/> | <input type="radio"/> | <input type="radio"/> | <input type="radio"/> |
| safety data in animals          | <input type="radio"/> | <input type="radio"/> | <input type="radio"/> | <input type="radio"/> |
| efficacy data in animals        | <input type="radio"/> | <input type="radio"/> | <input type="radio"/> | <input type="radio"/> |

Say whether you agree with these statements about the clinical evaluation of a therapeutic innovation?(0: strongly disagree- 10: strongly agree)

|                                                      |                                                                     |                |
|------------------------------------------------------|---------------------------------------------------------------------|----------------|
| It should follow the same rules as for any treatment | strongly disagree                                                   | strongly agree |
|                                                      | <div><div></div></div> <div>(Place a mark on the scale above)</div> |                |
| It must be simplified                                | strongly disagree                                                   | strongly agree |
|                                                      | <div><div></div></div> <div>(Place a mark on the scale above)</div> |                |

|                                                 |                                   |                |
|-------------------------------------------------|-----------------------------------|----------------|
| Clinical data may not be available              | strongly disagree                 | strongly agree |
|                                                 | <div></div>                       |                |
|                                                 | (Place a mark on the scale above) |                |
| Randomised clinical trials may not be available | strongly disagree                 | strongly agree |
|                                                 | <div></div>                       |                |
|                                                 | (Place a mark on the scale above) |                |
| It must give priority to safety data            | strongly disagree                 | strongly agree |
|                                                 | <div></div>                       |                |
|                                                 | (Place a mark on the scale above) |                |
| Priority should be given to efficacy data       | strongly disagree                 | strongly agree |
|                                                 | <div></div>                       |                |
|                                                 | (Place a mark on the scale above) |                |
| It must give priority to pharmacological data   | strongly disagree                 | strongly agree |
|                                                 | <div></div>                       |                |
|                                                 | (Place a mark on the scale above) |                |

Other comments

|                                                                        |  |
|------------------------------------------------------------------------|--|
| Do you see any specific ethical problems with therapeutic innovations? |  |
| Do you have any other comments?                                        |  |
